# Supplementary material
Source: publisher figshare collection journal article supplement (https://karger.figshare.com/articles/dataset/_/22331431)
Supplement: Supplementary file 1 [file 1]

**Supplementary Material 1:** GAS Search Terms

1. **PubMed**
   1. (("Neurodegenerative disease*"[Mesh] OR "Neurodegenerative disease*"[tiab] OR "Chronic Traumatic Encephalopathy"[tiab] OR "Heredodegenerative Disorders, Nervous System"[tiab] OR "Alexander Disease"[tiab] OR "Amyloid Neuropathies, Familial"[tiab] OR "Bulbo-Spinal Atrophy, X-Linked"[tiab] OR "Canavan Disease"[tiab] OR "Cockayne Syndrome"[tiab] OR "Dystonia Musculorum Deformans"[tiab] OR "Gerstmann-Straussler-Scheinker Disease"[tiab] OR "Hepatolenticular Degeneration"[tiab] OR "Hereditary Central Nervous System Demyelinating Diseases"[tiab] OR "Hereditary Sensory and Autonomic Neuropathies"[tiab] OR "Hereditary Sensory and Motor Neuropathy"[tiab] OR "Huntington Disease"[tiab] OR "Lafora Disease"[tiab] OR "Myotonia Congenita"[tiab] OR "Myotonic Dystrophy"[tiab] OR Neurofibromatoses[tiab] OR "Neuronal Ceroid-Lipofuscinoses"[tiab] OR "Optic Atrophies, Hereditary"[tiab] OR "Pantothenate Kinase-Associated Neurodegeneration"[tiab] OR "Spinal Muscular Atrophies of Childhood"[tiab] OR "Spinocerebellar Degenerations +"[tiab] OR "Tourette Syndrome"[tiab] OR "Tuberous Sclerosis"[tiab] OR "Unverricht-Lundborg Syndrome"[tiab] OR "Motor Neuron Disease"[tiab] OR "Amyotrophic Lateral Sclerosis"[tiab] OR "Bulbar Palsy, Progressive"[tiab] OR "Muscular Atrophy, Spinal"[tiab] OR "Paraneoplastic Syndromes, Nervous System"[tiab] OR "Anti-N-Methyl-D-Aspartate Receptor Encephalitis"[tiab] OR "Limbic Encephalitis"[tiab] OR "Myasthenia Gravis"[tiab] OR "Myelitis, TransverseOR “Opsoclonus-Myoclonus Syndrome”"[tiab] OR "Paraneoplastic Cerebellar Degeneration"[tiab] OR "Paraneoplastic Polyneuropathy"[tiab] OR "Postpoliomyelitis Syndrome"[tiab] OR "Prion Diseases"[tiab] OR "Encephalopathy, Bovine Spongiform"[tiab] OR "Gerstmann-Straussler-Scheinker Disease"[tiab] OR "Insomnia, Fatal Familial"[tiab] OR Kuru[tiab] OR Scrapie[tiab] OR "Wasting Disease, Chronic"[tiab] OR "Subacute Combined Degeneration"[tiab] OR Synucleinopathies[tiab] OR "Lewy Body Disease"[tiab] OR "Multiple System Atrophy"[tiab] OR "Parkinson Disease"[tiab] OR Tauopathies[tiab] OR "Alzheimer Disease"[tiab] OR "Diffuse Neurofibrillary Tangles with Calcification"[tiab] OR "Supranuclear Palsy, Progressive"[tiab] OR "TDP-43 Proteinopathies"[tiab] OR "Amyotrophic Lateral Sclerosis"[tiab] OR "Frontotemporal Lobar Degeneration"[tiab]) OR (Dementia[Mesh] OR Dementia[tiab] OR "AIDS Dementia Complex"[tiab] OR "Alzheimer Disease"[tiab] OR "Aphasia, Primary Progressive"[tiab] OR "Primary Progressive Nonfluent Aphasia"[tiab] OR "Creutzfeldt-Jakob Syndrome"[tiab] OR "Dementia, Vascular"[tiab] OR CADASIL[tiab] OR "Dementia "[tiab] OR "Diffuse Neurofibrillary Tangles with Calcification"[tiab] OR "Frontotemporal Lobar Degeneration"[tiab] OR "Frontotemporal Dementia"[tiab] OR "Primary Progressive Nonfluent Aphasia"[tiab] OR "Huntington Disease"[tiab] OR "Kluver-Bucy Syndrome"[tiab] OR "Lewy Body Disease"[tiab]) OR ("Cognitive Dysfunction"[Mesh] OR "Cognitive Dysfunction"[tiab] OR "Chemotherapy-Related Cognitive Impairment"[tiab] OR "Postoperative Cognitive Complications"[tiab])) AND ("Goal Attainment Scal*"[tiab])
2. **MEDLINE (Ovid)**
   1. ((exp "Neurodegenerative disease*"/ OR "Neurodegenerative disease*".tw. OR "Chronic Traumatic Encephalopathy".tw. OR "Heredodegenerative Disorders, Nervous System".tw. OR "Alexander Disease".tw. OR "Amyloid Neuropathies, Familial".tw. OR "Bulbo-Spinal Atrophy, X-Linked".tw. OR "Canavan Disease".tw. OR "Cockayne Syndrome".tw. OR "Dystonia Musculorum Deformans".tw. OR "Gerstmann-Straussler-Scheinker Disease".tw. OR "Hepatolenticular Degeneration".tw. OR "Hereditary Central Nervous System Demyelinating Diseases".tw. OR "Hereditary Sensory and Autonomic Neuropathies".tw. OR "Hereditary Sensory and Motor Neuropathy".tw. OR "Huntington Disease".tw. OR "Lafora Disease".tw. OR "Myotonia Congenita".tw. OR "Myotonic Dystrophy".tw. OR Neurofibromatoses.tw. OR "Neuronal Ceroid-Lipofuscinoses".tw. OR "Optic Atrophies, Hereditary".tw. OR "Pantothenate Kinase-Associated Neurodegeneration".tw. OR "Spinal Muscular Atrophies of Childhood".tw. OR "Spinocerebellar Degenerations +".tw. OR "Tourette Syndrome".tw. OR "Tuberous Sclerosis".tw. OR "Unverricht-Lundborg Syndrome".tw. OR "Motor Neuron Disease".tw. OR "Amyotrophic Lateral Sclerosis".tw. OR "Bulbar Palsy, Progressive".tw. OR "Muscular Atrophy, Spinal".tw. OR "Paraneoplastic Syndromes, Nervous System".tw. OR "Anti-N-Methyl-D-Aspartate Receptor Encephalitis".tw. OR "Limbic Encephalitis".tw. OR "Myasthenia Gravis".tw. OR "Myelitis, TransverseOR “Opsoclonus-Myoclonus Syndrome”".tw. OR "Paraneoplastic Cerebellar Degeneration".tw. OR "Paraneoplastic Polyneuropathy".tw. OR "Postpoliomyelitis Syndrome".tw. OR "Prion Diseases".tw. OR "Encephalopathy, Bovine Spongiform".tw. OR "Gerstmann-Straussler-Scheinker Disease".tw. OR "Insomnia, Fatal Familial".tw. OR Kuru.tw. OR Scrapie.tw. OR "Wasting Disease, Chronic".tw. OR "Subacute Combined Degeneration".tw. OR Synucleinopathies.tw. OR "Lewy Body Disease".tw. OR "Multiple System Atrophy".tw. OR "Parkinson Disease".tw. OR Tauopathies.tw. OR "Alzheimer Disease".tw. OR "Diffuse Neurofibrillary Tangles with Calcification".tw. OR "Supranuclear Palsy, Progressive".tw. OR "TDP-43 Proteinopathies".tw. OR "Amyotrophic Lateral Sclerosis".tw. OR "Frontotemporal Lobar Degeneration".tw.) OR (exp Dementia/ OR Dementia.tw. OR "AIDS Dementia Complex".tw. OR "Alzheimer Disease".tw. OR "Aphasia, Primary Progressive".tw. OR "Primary Progressive Nonfluent Aphasia".tw. OR "Creutzfeldt-Jakob Syndrome".tw. OR "Dementia, Vascular".tw. OR CADASIL.tw. OR "Dementia, Multi-Infarct".tw. OR "Diffuse Neurofibrillary Tangles with Calcification".tw. OR "Frontotemporal Lobar Degeneration".tw. OR "Frontotemporal Dementia".tw. OR "Primary Progressive Nonfluent Aphasia".tw. OR "Huntington Disease".tw. OR "Kluver-Bucy Syndrome".tw. OR "Lewy Body Disease".tw.) OR (exp "Cognitive Dysfunction"/ OR "Cognitive Dysfunction".tw. OR "Chemotherapy-Related Cognitive Impairment".tw. OR "Postoperative Cognitive Complications".tw.)) AND ("Goal Attainment Scal*".tw.)
3. **Cochrane Library (CENTRAL)**
   1. ((mh “Neurodegenerative Diseases”) OR “Neurodegenerative Diseases” OR “Chronic Traumatic Encephalopathy” OR “Heredodegenerative Disorders, Nervous System” OR “Motor Neuron Disease” OR “Paraneoplastic Syndromes, Nervous System” OR “Postpoliomyelitis Syndrome” OR “Prion Diseases” OR “Subacute Combined Degeneration” OR “Synucleinopathies” OR “Tauopathies” OR “TDP-43 Proteinopathies” OR (mh “Dementia”) OR “AIDS Dementia Complex” OR “Alzheimer Disease” OR “Aphasia, Primary Progressive” OR “Creutzfeldt-Jakob Syndrome” OR “Vascular Dementia” OR “Dementia” OR “Diffuse Neurofibrillary Tangles with Calcification” OR “Frontotemporal Lobar Degeneration” OR “Huntington Disease” OR “Kluver-Bucy Syndrome” OR “Lewy Body Disease” OR (mh “Cognitive Dysfunction”) OR “Cognitive Dysfunction” OR “Chemotherapy-Related Cognitive Impairment” OR “Postoperative Cognitive Complications”) AND (“Goal Attainment Scaling” OR “Goal Attainment Scale”)
4. **Embase (Elsevier)**
   1. ('neurodegenerative disease*' OR 'neurodegenerative disease*':ti,ab OR 'chronic traumatic encephalopathy':ti,ab OR 'heredodegenerative disorders, nervous system':ti,ab OR 'alexander disease':ti,ab OR 'amyloid neuropathies, familial':ti,ab OR 'bulbo-spinal atrophy, x-linked':ti,ab OR 'canavan disease':ti,ab OR 'cockayne syndrome':ti,ab OR 'dystonia musculorum deformans':ti,ab OR 'hepatolenticular degeneration':ti,ab OR 'hereditary central nervous system demyelinating diseases':ti,ab OR 'hereditary sensory and autonomic neuropathies':ti,ab OR 'hereditary sensory and motor neuropathy':ti,ab OR 'lafora disease':ti,ab OR 'myotonia congenita':ti,ab OR 'myotonic dystrophy':ti,ab OR neurofibromatoses:ti,ab OR 'neuronal ceroid-lipofuscinoses':ti,ab OR 'optic atrophies, hereditary':ti,ab OR 'pantothenate kinase-associated neurodegeneration':ti,ab OR 'spinal muscular atrophies of childhood':ti,ab OR 'spinocerebellar degenerations +':ti,ab OR 'tourette syndrome':ti,ab OR 'tuberous sclerosis':ti,ab OR 'unverricht-lundborg syndrome':ti,ab OR 'motor neuron disease':ti,ab OR 'bulbar palsy, progressive':ti,ab OR 'muscular atrophy, spinal':ti,ab OR 'paraneoplastic syndromes, nervous system':ti,ab OR 'anti-n-methyl-d-aspartate receptor encephalitis':ti,ab OR 'limbic encephalitis':ti,ab OR 'myasthenia gravis':ti,ab OR 'myelitis, transverse or opsoclonus-myoclonus syndrome':ti,ab OR 'paraneoplastic cerebellar degeneration':ti,ab OR 'paraneoplastic polyneuropathy':ti,ab OR 'postpoliomyelitis syndrome':ti,ab OR 'prion diseases':ti,ab OR 'encephalopathy, bovine spongiform':ti,ab OR 'gerstmann-straussler-scheinker disease':ti,ab OR 'insomnia, fatal familial':ti,ab OR kuru:ti,ab OR scrapie:ti,ab OR 'wasting disease, chronic':ti,ab OR 'subacute combined degeneration':ti,ab OR synucleinopathies:ti,ab OR 'multiple system atrophy':ti,ab OR 'parkinson disease':ti,ab OR tauopathies:ti,ab OR 'supranuclear palsy, progressive':ti,ab OR 'tdp-43 proteinopathies':ti,ab OR 'amyotrophic lateral sclerosis':ti,ab OR 'dementia'/exp OR dementia OR dementia:ti,ab OR 'aids dementia complex':ti,ab OR 'alzheimer disease':ti,ab OR 'aphasia, primary progressive':ti,ab OR 'creutzfeldt-jakob syndrome':ti,ab OR 'dementia, vascular':ti,ab OR cadasil:ti,ab OR 'dementia, multi-infarct':ti,ab OR 'diffuse neurofibrillary tangles with calcification':ti,ab OR 'frontotemporal lobar degeneration':ti,ab OR 'frontotemporal dementia':ti,ab OR 'primary progressive nonfluent aphasia':ti,ab OR 'huntington disease':ti,ab OR 'kluver-bucy syndrome':ti,ab OR 'lewy body disease':ti,ab OR 'cognitive dysfunction'/exp OR 'cognitive dysfunction' OR 'cognitive dysfunction':ti,ab OR 'chemotherapy-related cognitive impairment':ti,ab OR 'postoperative cognitive complications':ti,ab) AND ('goal attainment scal*':ti,ab)
5. **Scopus**
   1. ((INDEXTERMS("Neurodegenerative disease*") OR TITLE-ABS("Neurodegenerative disease*") OR TITLE-ABS("Chronic Traumatic Encephalopathy") OR TITLE-ABS("Heredodegenerative Disorders, Nervous System") OR TITLE-ABS("Alexander Disease") OR TITLE-ABS("Amyloid Neuropathies, Familial") OR TITLE-ABS("Bulbo-Spinal Atrophy, X-Linked") OR TITLE-ABS("Canavan Disease") OR TITLE-ABS("Cockayne Syndrome") OR TITLE-ABS("Dystonia Musculorum Deformans") OR TITLE-ABS("Gerstmann-Straussler-Scheinker Disease") OR TITLE-ABS("Hepatolenticular Degeneration") OR TITLE-ABS("Hereditary Central Nervous System Demyelinating Diseases") OR TITLE-ABS("Hereditary Sensory and Autonomic Neuropathies") OR TITLE-ABS("Hereditary Sensory and Motor Neuropathy") OR TITLE-ABS("Huntington Disease") OR TITLE-ABS("Lafora Disease") OR TITLE-ABS("Myotonia Congenita") OR TITLE-ABS("Myotonic Dystrophy") OR TITLE-ABS(Neurofibromatoses) OR TITLE-ABS("Neuronal Ceroid-Lipofuscinoses") OR TITLE-ABS("Optic Atrophies, Hereditary") OR TITLE-ABS("Pantothenate Kinase-Associated Neurodegeneration") OR TITLE-ABS("Spinal Muscular Atrophies of Childhood") OR TITLE-ABS("Spinocerebellar Degenerations +") OR TITLE-ABS("Tourette Syndrome") OR TITLE-ABS("Tuberous Sclerosis") OR TITLE-ABS("Unverricht-Lundborg Syndrome") OR TITLE-ABS("Motor Neuron Disease") OR TITLE-ABS("Amyotrophic Lateral Sclerosis") OR TITLE-ABS("Bulbar Palsy, Progressive") OR TITLE-ABS("Muscular Atrophy, Spinal") OR TITLE-ABS("Paraneoplastic Syndromes, Nervous System") OR TITLE-ABS("Anti-N-Methyl-D-Aspartate Receptor Encephalitis") OR TITLE-ABS("Limbic Encephalitis") OR TITLE-ABS("Myasthenia Gravis") OR TITLE-ABS("Myelitis, TransverseOR “Opsoclonus-Myoclonus Syndrome”") OR TITLE-ABS("Paraneoplastic Cerebellar Degeneration") OR TITLE-ABS("Paraneoplastic Polyneuropathy") OR TITLE-ABS("Postpoliomyelitis Syndrome") OR TITLE-ABS("Prion Diseases") OR TITLE-ABS("Encephalopathy, Bovine Spongiform") OR TITLE-ABS("Gerstmann-Straussler-Scheinker Disease") OR TITLE-ABS("Insomnia, Fatal Familial") OR TITLE-ABS(Kuru) OR TITLE-ABS(Scrapie) OR TITLE-ABS("Wasting Disease, Chronic") OR TITLE-ABS("Subacute Combined Degeneration") OR TITLE-ABS(Synucleinopathies) OR TITLE-ABS("Lewy Body Disease") OR TITLE-ABS("Multiple System Atrophy") OR TITLE-ABS("Parkinson Disease") OR TITLE-ABS(Tauopathies) OR TITLE-ABS("Alzheimer Disease") OR TITLE-ABS("Diffuse Neurofibrillary Tangles with Calcification") OR TITLE-ABS("Supranuclear Palsy, Progressive") OR TITLE-ABS("TDP-43 Proteinopathies") OR TITLE-ABS("Amyotrophic Lateral Sclerosis") OR TITLE-ABS("Frontotemporal Lobar Degeneration")) OR (INDEXTERMS(Dementia) OR TITLE-ABS(Dementia) OR TITLE-ABS("AIDS Dementia Complex") OR TITLE-ABS("Alzheimer Disease") OR TITLE-ABS("Aphasia, Primary Progressive") OR TITLE-ABS("Primary Progressive Nonfluent Aphasia") OR TITLE-ABS("Creutzfeldt-Jakob Syndrome") OR TITLE-ABS("Dementia, Vascular") OR TITLE-ABS(CADASIL) OR TITLE-ABS("Dementia, Multi-Infarct") OR TITLE-ABS("Diffuse Neurofibrillary Tangles with Calcification") OR TITLE-ABS("Frontotemporal Lobar Degeneration") OR TITLE-ABS("Frontotemporal Dementia") OR TITLE-ABS("Primary Progressive Nonfluent Aphasia") OR TITLE-ABS("Huntington Disease") OR TITLE-ABS("Kluver-Bucy Syndrome") OR TITLE-ABS("Lewy Body Disease")) OR (INDEXTERMS("Cognitive Dysfunction") OR TITLE-ABS("Cognitive Dysfunction") OR TITLE-ABS("Chemotherapy-Related Cognitive Impairment") OR TITLE-ABS("Postoperative Cognitive Complications"))) AND (TITLE-ABS("Goal Attainment Scal*"))
6. **Web of Science**
   1. (TI=(("Neurodegenerative disease*" OR "Neurodegenerative disease*" OR "Chronic Traumatic Encephalopathy" OR "Heredodegenerative Disorders, Nervous System" OR "Alexander Disease" OR "Amyloid Neuropathies, Familial" OR "Bulbo-Spinal Atrophy, X-Linked" OR "Canavan Disease" OR "Cockayne Syndrome" OR "Dystonia Musculorum Deformans" OR "Gerstmann-Straussler-Scheinker Disease" OR "Hepatolenticular Degeneration" OR "Hereditary Central Nervous System Demyelinating Diseases" OR "Hereditary Sensory and Autonomic Neuropathies" OR "Hereditary Sensory and Motor Neuropathy" OR "Huntington Disease" OR "Lafora Disease" OR "Myotonia Congenita" OR "Myotonic Dystrophy" OR "Neurofibromatoses" OR "Neuronal Ceroid-Lipofuscinoses" OR "Optic Atrophies, Hereditary" OR "Pantothenate Kinase-Associated Neurodegeneration" OR "Spinal Muscular Atrophies of Childhood" OR "Spinocerebellar Degenerations +" OR "Tourette Syndrome" OR "Tuberous Sclerosis" OR "Unverricht-Lundborg Syndrome" OR "Motor Neuron Disease" OR "Amyotrophic Lateral Sclerosis" OR "Bulbar Palsy, Progressive" OR "Muscular Atrophy, Spinal" OR "Paraneoplastic Syndromes, Nervous System" OR "Anti-N-Methyl-D-Aspartate Receptor Encephalitis" OR "Limbic Encephalitis" OR "Myasthenia Gravis" OR "Myelitis, Transverse" OR "Opsoclonus-Myoclonus Syndrome" OR "Paraneoplastic Cerebellar Degeneration" OR "Paraneoplastic Polyneuropathy" OR "Postpoliomyelitis Syndrome" OR "Prion Diseases" OR "Encephalopathy, Bovine Spongiform" OR "Gerstmann-Straussler-Scheinker Disease" OR "Insomnia, Fatal Familial" OR "Kuru" OR "Scrapie" OR "Wasting Disease, Chronic" OR "Subacute Combined Degeneration" OR "Synucleinopathies" OR "Lewy Body Disease" OR "Multiple System Atrophy" OR "Parkinson Disease" OR "Tauopathies" OR "Alzheimer Disease" OR "Diffuse Neurofibrillary Tangles with Calcification" OR "Supranuclear Palsy, Progressive" OR "TDP-43 Proteinopathies" OR "Amyotrophic Lateral Sclerosis" OR "Frontotemporal Lobar Degeneration" OR "Dementia" OR "Dementia" OR "AIDS Dementia Complex" OR "Alzheimer Disease" OR "Aphasia, Primary Progressive" OR "Primary Progressive Nonfluent Aphasia" OR "Creutzfeldt-Jakob Syndrome" OR "Dementia, Vascular" OR "CADASIL" OR "Dementia, Multi-Infarct" OR "Diffuse Neurofibrillary Tangles with Calcification" OR "Frontotemporal Lobar Degeneration" OR "Frontotemporal Dementia" OR "Primary Progressive Nonfluent Aphasia" OR "Huntington Disease" OR "Kluver-Bucy Syndrome" OR "Lewy Body Disease" OR "Cognitive Dysfunction" OR "Cognitive Dysfunction" OR "Chemotherapy-Related Cognitive Impairment" OR "Postoperative Cognitive Complications") AND ("Goal Attainment Scal*"))) OR (AB=(("Neurodegenerative disease*" OR "Neurodegenerative disease*" OR "Chronic Traumatic Encephalopathy" OR "Heredodegenerative Disorders, Nervous System" OR "Alexander Disease" OR "Amyloid Neuropathies, Familial" OR "Bulbo-Spinal Atrophy, X-Linked" OR "Canavan Disease" OR "Cockayne Syndrome" OR "Dystonia Musculorum Deformans" OR "Gerstmann-Straussler-Scheinker Disease" OR "Hepatolenticular Degeneration" OR "Hereditary Central Nervous System Demyelinating Diseases" OR "Hereditary Sensory and Autonomic Neuropathies" OR "Hereditary Sensory and Motor Neuropathy" OR "Huntington Disease" OR "Lafora Disease" OR "Myotonia Congenita" OR "Myotonic Dystrophy" OR "Neurofibromatoses" OR "Neuronal Ceroid-Lipofuscinoses" OR "Optic Atrophies, Hereditary" OR "Pantothenate Kinase-Associated Neurodegeneration" OR "Spinal Muscular Atrophies of Childhood" OR "Spinocerebellar Degenerations +" OR "Tourette Syndrome" OR "Tuberous Sclerosis" OR "Unverricht-Lundborg Syndrome" OR "Motor Neuron Disease" OR "Amyotrophic Lateral Sclerosis" OR "Bulbar Palsy, Progressive" OR "Muscular Atrophy, Spinal" OR "Paraneoplastic Syndromes, Nervous System" OR "Anti-N-Methyl-D-Aspartate Receptor Encephalitis" OR "Limbic Encephalitis" OR "Myasthenia Gravis" OR "Myelitis, Transverse" OR "Opsoclonus-Myoclonus Syndrome" OR "Paraneoplastic Cerebellar Degeneration" OR "Paraneoplastic Polyneuropathy" OR "Postpoliomyelitis Syndrome" OR "Prion Diseases" OR "Encephalopathy, Bovine Spongiform" OR "Gerstmann-Straussler-Scheinker Disease" OR "Insomnia, Fatal Familial" OR "Kuru" OR "Scrapie" OR "Wasting Disease, Chronic" OR "Subacute Combined Degeneration" OR "Synucleinopathies" OR "Lewy Body Disease" OR "Multiple System Atrophy" OR "Parkinson Disease" OR "Tauopathies" OR "Alzheimer Disease" OR "Diffuse Neurofibrillary Tangles with Calcification" OR "Supranuclear Palsy, Progressive" OR "TDP-43 Proteinopathies" OR "Amyotrophic Lateral Sclerosis" OR "Frontotemporal Lobar Degeneration" OR "Dementia" OR "Dementia" OR "AIDS Dementia Complex" OR "Alzheimer Disease" OR "Aphasia, Primary Progressive" OR "Primary Progressive Nonfluent Aphasia" OR "Creutzfeldt-Jakob Syndrome" OR "Dementia, Vascular" OR "CADASIL" OR "Dementia, Multi-Infarct" OR "Diffuse Neurofibrillary Tangles with Calcification" OR "Frontotemporal Lobar Degeneration" OR "Frontotemporal Dementia" OR "Primary Progressive Nonfluent Aphasia" OR "Huntington Disease" OR "Kluver-Bucy Syndrome" OR "Lewy Body Disease" OR "Cognitive Dysfunction" OR "Cognitive Dysfunction" OR "Chemotherapy-Related Cognitive Impairment" OR "Postoperative Cognitive Complications") AND ("Goal Attainment Scal*")))
7. **CINAHL**
   1. (((MH "Neurodegenerative disease*+") OR (TI "Neurodegenerative disease*" OR AB "Neurodegenerative disease*") OR (TI "Chronic Traumatic Encephalopathy" OR AB "Chronic Traumatic Encephalopathy") OR (TI "Heredodegenerative Disorders, Nervous System" OR AB "Heredodegenerative Disorders, Nervous System") OR (TI "Alexander Disease" OR AB "Alexander Disease") OR (TI "Amyloid Neuropathies, Familial" OR AB "Amyloid Neuropathies, Familial") OR (TI "Bulbo-Spinal Atrophy, X-Linked" OR AB "Bulbo-Spinal Atrophy, X-Linked") OR (TI "Canavan Disease" OR AB "Canavan Disease") OR (TI "Cockayne Syndrome" OR AB "Cockayne Syndrome") OR (TI "Dystonia Musculorum Deformans" OR AB "Dystonia Musculorum Deformans") OR (TI "Gerstmann-Straussler-Scheinker Disease" OR AB "Gerstmann-Straussler-Scheinker Disease") OR (TI "Hepatolenticular Degeneration" OR AB "Hepatolenticular Degeneration") OR (TI "Hereditary Central Nervous System Demyelinating Diseases" OR AB "Hereditary Central Nervous System Demyelinating Diseases") OR (TI "Hereditary Sensory and Autonomic Neuropathies" OR AB "Hereditary Sensory and Autonomic Neuropathies") OR (TI "Hereditary Sensory and Motor Neuropathy" OR AB "Hereditary Sensory and Motor Neuropathy") OR (TI "Huntington Disease" OR AB "Huntington Disease") OR (TI "Lafora Disease" OR AB "Lafora Disease") OR (TI "Myotonia Congenita" OR AB "Myotonia Congenita") OR (TI "Myotonic Dystrophy" OR AB "Myotonic Dystrophy") OR (TI Neurofibromatoses OR AB Neurofibromatoses) OR (TI "Neuronal Ceroid-Lipofuscinoses" OR AB "Neuronal Ceroid-Lipofuscinoses") OR (TI "Optic Atrophies, Hereditary" OR AB "Optic Atrophies, Hereditary") OR (TI "Pantothenate Kinase-Associated Neurodegeneration" OR AB "Pantothenate Kinase-Associated Neurodegeneration") OR (TI "Spinal Muscular Atrophies of Childhood" OR AB "Spinal Muscular Atrophies of Childhood") OR (TI "Spinocerebellar Degenerations +" OR AB "Spinocerebellar Degenerations +") OR (TI "Tourette Syndrome" OR AB "Tourette Syndrome") OR (TI "Tuberous Sclerosis" OR AB "Tuberous Sclerosis") OR (TI "Unverricht-Lundborg Syndrome" OR AB "Unverricht-Lundborg Syndrome") OR (TI "Motor Neuron Disease" OR AB "Motor Neuron Disease") OR (TI "Amyotrophic Lateral Sclerosis" OR AB "Amyotrophic Lateral Sclerosis") OR (TI "Bulbar Palsy, Progressive" OR AB "Bulbar Palsy, Progressive") OR (TI "Muscular Atrophy, Spinal" OR AB "Muscular Atrophy, Spinal") OR (TI "Paraneoplastic Syndromes, Nervous System" OR AB "Paraneoplastic Syndromes, Nervous System") OR (TI "Anti-N-Methyl-D-Aspartate Receptor Encephalitis" OR AB "Anti-N-Methyl-D-Aspartate Receptor Encephalitis") OR (TI "Limbic Encephalitis" OR AB "Limbic Encephalitis") OR (TI "Myasthenia Gravis" OR AB "Myasthenia Gravis") OR (TI "Myelitis, TransverseOR “Opsoclonus-Myoclonus Syndrome”" OR AB "Myelitis, TransverseOR “Opsoclonus-Myoclonus Syndrome”") OR (TI "Paraneoplastic Cerebellar Degeneration" OR AB "Paraneoplastic Cerebellar Degeneration") OR (TI "Paraneoplastic Polyneuropathy" OR AB "Paraneoplastic Polyneuropathy") OR (TI "Postpoliomyelitis Syndrome" OR AB "Postpoliomyelitis Syndrome") OR (TI "Prion Diseases" OR AB "Prion Diseases") OR (TI "Encephalopathy, Bovine Spongiform" OR AB "Encephalopathy, Bovine Spongiform") OR (TI "Gerstmann-Straussler-Scheinker Disease" OR AB "Gerstmann-Straussler-Scheinker Disease") OR (TI "Insomnia, Fatal Familial" OR AB "Insomnia, Fatal Familial") OR (TI Kuru OR AB Kuru) OR (TI Scrapie OR AB Scrapie) OR (TI "Wasting Disease, Chronic" OR AB "Wasting Disease, Chronic") OR (TI "Subacute Combined Degeneration" OR AB "Subacute Combined Degeneration") OR (TI Synucleinopathies OR AB Synucleinopathies) OR (TI "Lewy Body Disease" OR AB "Lewy Body Disease") OR (TI "Multiple System Atrophy" OR AB "Multiple System Atrophy") OR (TI "Parkinson Disease" OR AB "Parkinson Disease") OR (TI Tauopathies OR AB Tauopathies) OR (TI "Alzheimer Disease" OR AB "Alzheimer Disease") OR (TI "Diffuse Neurofibrillary Tangles with Calcification" OR AB "Diffuse Neurofibrillary Tangles with Calcification") OR (TI "Supranuclear Palsy, Progressive" OR AB "Supranuclear Palsy, Progressive") OR (TI "TDP-43 Proteinopathies" OR AB "TDP-43 Proteinopathies") OR (TI "Amyotrophic Lateral Sclerosis" OR AB "Amyotrophic Lateral Sclerosis") OR (TI "Frontotemporal Lobar Degeneration" OR AB "Frontotemporal Lobar Degeneration")) OR ((MH Dementia+) OR (TI Dementia OR AB Dementia) OR (TI "AIDS Dementia Complex" OR AB "AIDS Dementia Complex") OR (TI "Alzheimer Disease" OR AB "Alzheimer Disease") OR (TI "Aphasia, Primary Progressive" OR AB "Aphasia, Primary Progressive") OR (TI "Primary Progressive Nonfluent Aphasia" OR AB "Primary Progressive Nonfluent Aphasia") OR (TI "Creutzfeldt-Jakob Syndrome" OR AB "Creutzfeldt-Jakob Syndrome") OR (TI "Dementia, Vascular" OR AB "Dementia, Vascular") OR (TI CADASIL OR AB CADASIL) OR (TI "Dementia, Multi-Infarct" OR AB "Dementia, Multi-Infarct") OR (TI "Diffuse Neurofibrillary Tangles with Calcification" OR AB "Diffuse Neurofibrillary Tangles with Calcification") OR (TI "Frontotemporal Lobar Degeneration" OR AB "Frontotemporal Lobar Degeneration") OR (TI "Frontotemporal Dementia" OR AB "Frontotemporal Dementia") OR (TI "Primary Progressive Nonfluent Aphasia" OR AB "Primary Progressive Nonfluent Aphasia") OR (TI "Huntington Disease" OR AB "Huntington Disease") OR (TI "Kluver-Bucy Syndrome" OR AB "Kluver-Bucy Syndrome") OR (TI "Lewy Body Disease" OR AB "Lewy Body Disease")) OR ((MH "Cognitive Dysfunction+") OR (TI "Cognitive Dysfunction" OR AB "Cognitive Dysfunction") OR (TI "Chemotherapy-Related Cognitive Impairment" OR AB "Chemotherapy-Related Cognitive Impairment") OR (TI "Postoperative Cognitive Complications" OR AB "Postoperative Cognitive Complications"))) AND ((TI "Goal Attainment Scal*" OR AB "Goal Attainment Scal*"))
8. **PsychINFO**
   1. (((DE "Dementia" OR DE "AIDS Dementia Complex" OR DE "Dementia with Lewy Bodies" OR DE "Presenile Dementia" OR DE "Pseudodementia" OR DE "Semantic Dementia" OR DE "Senile Dementia" OR DE "Vascular Dementia" OR DE "Dementia with Lewy Bodies") OR (DE "Neurodegenerative Diseases" OR DE "Alzheimer's Disease" OR DE "Amyotrophic Lateral Sclerosis" OR DE "Corticobasal Degeneration" OR DE "Dementia with Lewy Bodies" OR DE "Multiple System Atrophy" OR DE "Parkinson's Disease" OR DE "Semantic Dementia")) OR (DE "Cognitive Impairment")) AND ("Goal Attainment Scal*")
9. **RehabData**
   1. (Dementia OR Alzheimer’s Disease OR Aging OR Neurological Disorders OR Huntington disease OR Multiple sclerosis OR Parkinson disease OR Neurodegenerative Disease OR Cognitive Impairment OR Cognitive Disorder OR Cognitive Dysfunction) AND (Goal Attainment Scal*)
10. **OTSeeker**
    1. “Goal Attainment Scal*”
